# Supplementary material for: Synthesis, Characterizations, and Thermochromic Properties of VO2 Particles Grafted with PSS : PEDOT
Source: Hindawi journal article supplement (doi:10.1155/2022/1866280), 2022-09-01
Supplement: f1 [file 1866280.f1.docx]

**Supplementary Information**

Detailed synthesis of various VO2 based particles

*Preparation of VO2@APTES*

6.5 g of VO2 particles was dispersed in 50 ml of toluene under stirring for 10 min followed by ultrasonication for 30 min. After that, 6.5 ml of APTES was added. The reaction was carried out at 80oC for 24 h under nitrogen atmosphere. Then, the obtained VO2@APTES particles were recovered by centrifugation and washed with ethanol for 3 times before drying in a vacuum oven at 80 oC for 3 h. Herein, the product was designated as VO2@NH2.

*Anchoring BIBB initiator on the VO2@APTES*

5 g of VO2@APTES particles was dispersed in 50 ml CH2Cl2 and sonicated for 1 h. After that, 0.90 ml of triethylamine, and a solution of CH2Cl2 containing 0.75 ml BIBB initiator was added dropwise into the reaction mixture at 0 oC. The reaction was kept stirring at 0 oC for 3 h. and then kept stirring at room temperature for 20 h. Then, the obtained VO2@Br particles were isolated and washed with CH2Cl2 for 3 times before drying in a vacuum oven at 80 oC for 12 h. The product was designated as VO2@Br.

*Grafting SSNa monomer onto VO2@BIBB*

2 g of VO2@Br particles was dispersed in 40 ml of mixture solvent (DI water:methanol 3:1 v/v) under the ultrasonic treatment. After that, a 10 ml of solution mixture containing 2.4743 g of SSNa and 0.3749 g Bpy was then add dropwise to the reaction. The mixture was degassed using nitrogen purge for 30 min with continuous stirring. Next, 0.17214 g CuBr was added into the reaction under nitrogen atmosphere and again the reaction was degassed under nitrogen purge for 30 min. At last, the reaction was stirring at room temperature for 12 and 24 h. The product was recovered by centrifugation and washed with deionized water for 3 times before drying in a vacuum oven at 80 oC for 12 h. The product was designated as VO2@PSS.

*Preparation of VO2@PSS:PEDOT*

The VO2@PSS:PEDOT particles was prepared via chemical oxidative polymerization of EDOT in the presence of VO2@PSS particles. Firstly, 0.8 g of VO2@PSS particles was dispersed in 50 ml of deionized water under ultrasonication for 30 min. After that 2.1 ml of EDOT and 3.114 g of FeCl3.6H2O were added into the solution. The reaction was kept at room temperature for 42 h. The obtained particles were collected by filtration using Bucher funnel and washed with ethanol: DIwater (1:2 v/v) until the filtrate cannot make phenol discoloration. After that, the filter cake was dried under vacuum oven at at 80 oC for 3 h. Finally, the VO2@PSS:PEDOT particles black powder were obtained.
